# Supplementary material for: A Healthy Diet Rich in Calcium and Vitamin C Is Inversely Associated with Metabolic Syndrome Risk in Korean Adults from the KNHANES 2013–2017
Source: Nutrients. 2021 Apr 16;13(4):1312. doi: 10.3390/nu13041312 (PMC8073625; doi:10.3390/nu13041312)
Supplement: Supplementary file 1 [file nutrients-13-01312-s001.zip › nutrients-1158319-supplementary.pdf]

Supplementary Table S1. Components of and scoring standards for Korean Healthy Eating Index

| Components (score range)                            | Reference for score of each component                              |                      |
|-----------------------------------------------------|--------------------------------------------------------------------|----------------------|
|                                                     | Maximum score                                                      | Minimum score        |
| Having breakfast (0–10)                             | 5–7 day/week                                                       | 0 day/week           |
| Whole grain (0–5)                                   | ≥0.3 serving/day                                                   | 0 serving/day        |
| Total fruit, including juice (0–5)                  | Men: (aged 19–64) ≥3 serving/day,<br>(aged ≥65) ≥2 serving/day     | 0 serving/day        |
|                                                     | Women: (aged 19–64) ≥2 serving/day,<br>(aged ≥65) ≥1 serving/day   |                      |
| Fruit, excluding juice (0–5)                        | Men: (aged 19–64) ≥1.5 serving/day,<br>(aged ≥65) ≥1 serving/day   | 0 serving/day        |
|                                                     | Women: (aged 19–64) ≥1 serving/day,<br>(aged ≥65) ≥0.5 serving/day |                      |
| Total vegetable, including Kimchi and pickles (0–5) | Men: ≥8 serving/day                                                | 0 serving/day        |
|                                                     | Women: (aged 19–64) ≥8 serving/day,<br>(aged ≥65) ≥6 serving/day   |                      |
| Vegetable, excluding Kimchi and pickles (0–5)       | Men: ≥5 serving/day                                                | 0 serving/day        |
|                                                     | Women: (aged 19–64) ≥5 serving/day,<br>(aged ≥65) ≥3 serving/day   |                      |
| Meat, fish, eggs, and legumes (0–10)                | Men: (aged 19–64) ≥5 serving/day,<br>(aged ≥65): ≥4 serving/day    | 0 serving/day        |
|                                                     | Women: (aged 19–64) ≥4 serving/day,<br>(aged ≥65) ≥2.5 serving/day |                      |
| Milk and dairy (0–10)                               | ≥1 serving/day                                                     | 0 serving/day        |
| Sodium (0–10)                                       | ≤2,000 mg/day                                                      | >6,500 mg/day        |
| Saturated fatty acid (0–10)                         | ≤7% of energy                                                      | >10 % of energy      |
| Empty calorie foods (0–10)                          | ≤10% of energy                                                     | >20 % of energy      |
| Carbohydrate (0–5)                                  | 55–65% of energy                                                   | <50%, >75% of energy |
| Fat (0–5)                                           | 15–30% of energy                                                   | <10%, >35% of energy |
| Total energy (0–5)                                  | 75–125% of EER by sex and age group <60%, >140% of EAR             |                      |

EER = estimated energy requirement.
